# Supplementary material
Source: Springer Nature journal article supplement (https://www.springermedizin.de/resource/supplementary/13256_2011_2045_MOESM3_ESM.pdf/9649746)

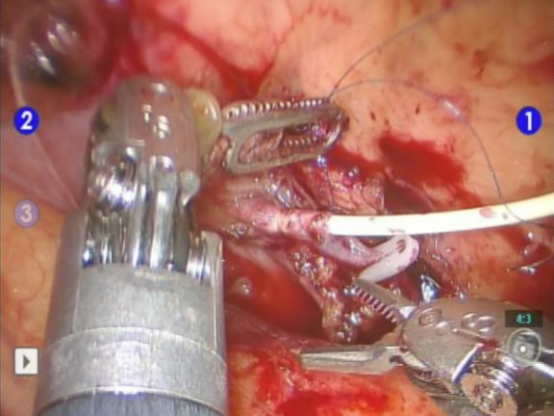

2

1

3

43

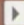

Supplement: MOESM3 [file 9649746]
